# Supplementary material
Source: Springer Nature journal article supplement (https://www.springermedizin.de/resource/supplementary/13054_2010_9292_MOESM3_ESM.pdf/9734122)

- Pre-implementation phase
- Implementation phase
- Post-implementation phase

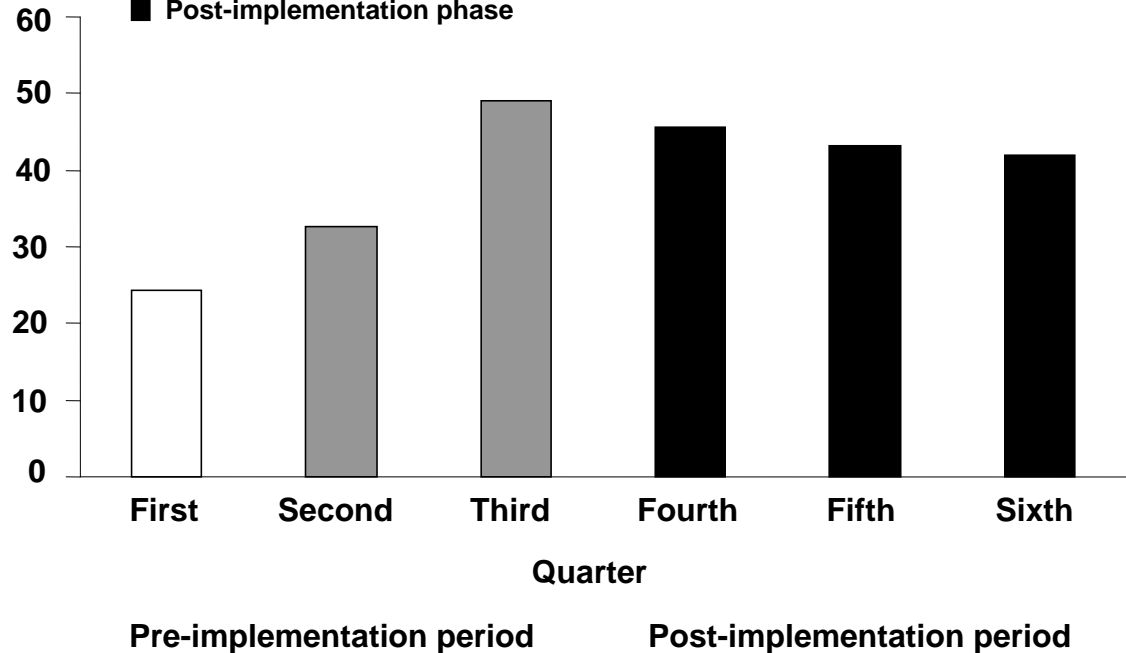

Supplement: MOESM3 [file 9734122]
